# Supplementary material
Source: PubMed Central journal article supplement (PMC7198374)

**Supplemental Figure 1.** Normal organ uptake in (A) spleen; (B) bone marrow; (C) liver; (D) aorta; (E) kidney; and (F) lung at different minibody masses. The y-axis represents the ratio of SUVmean of reference organs to SUVmean muscle per LBW.

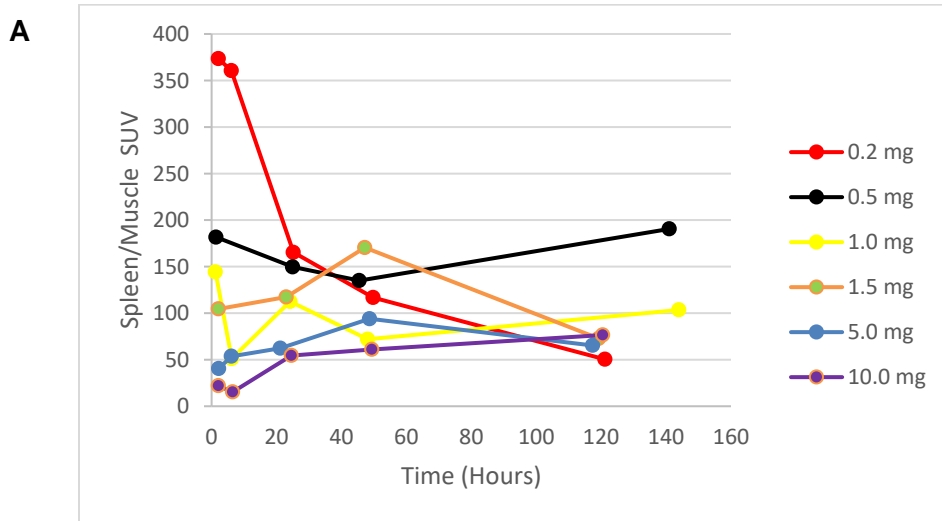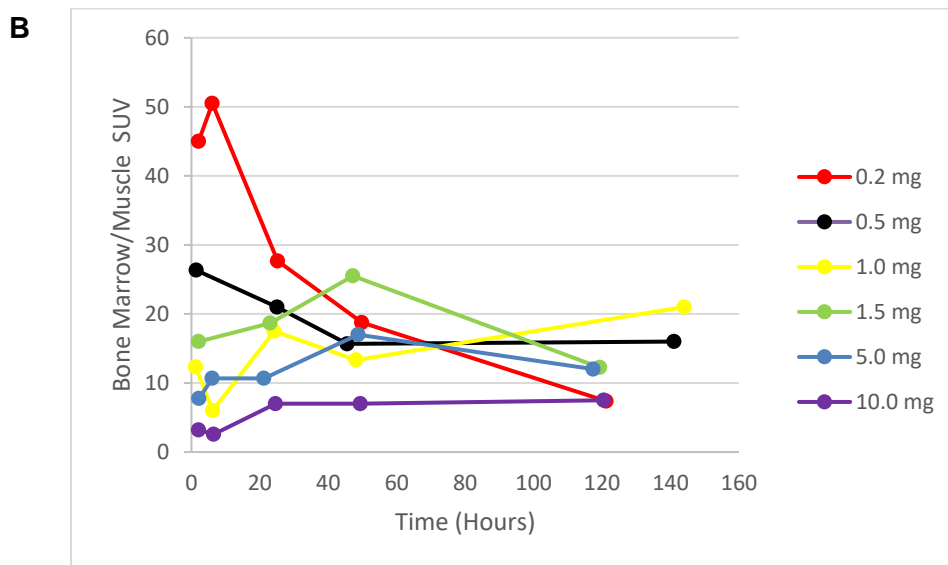

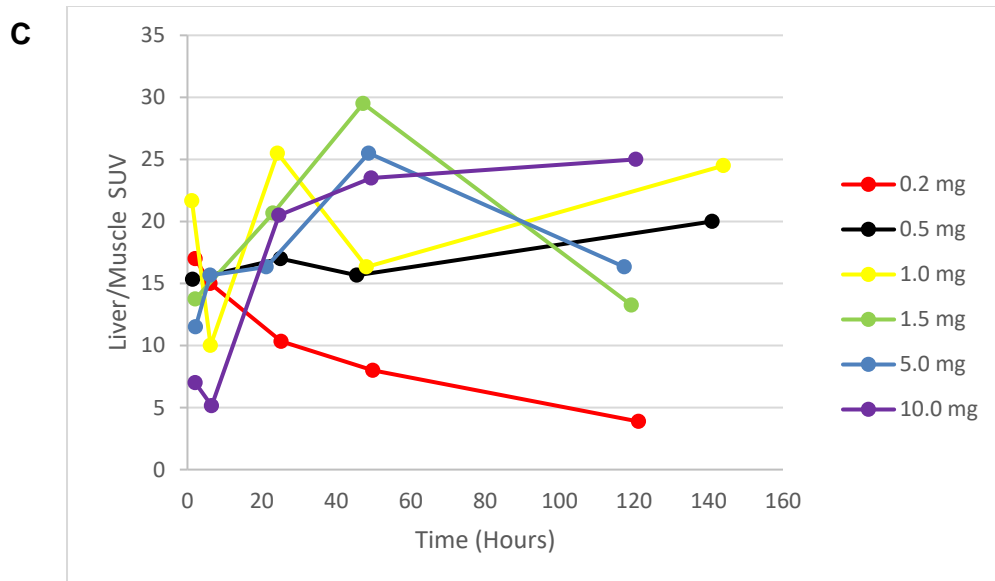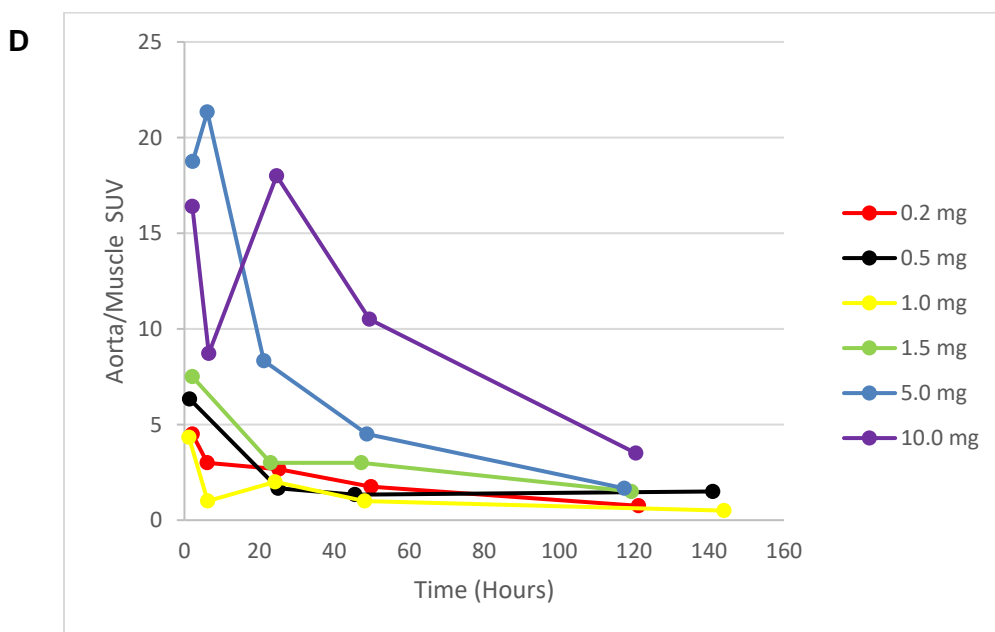

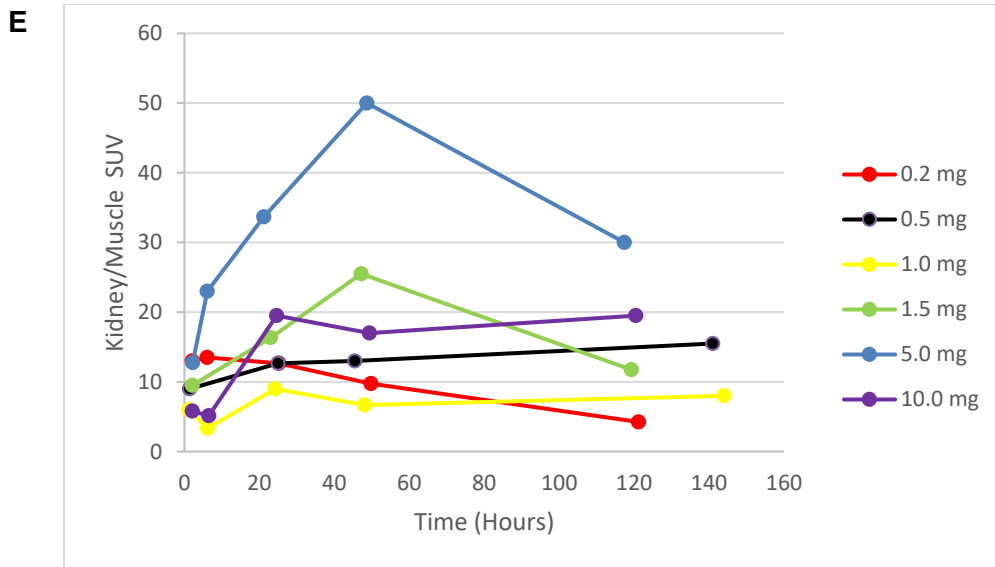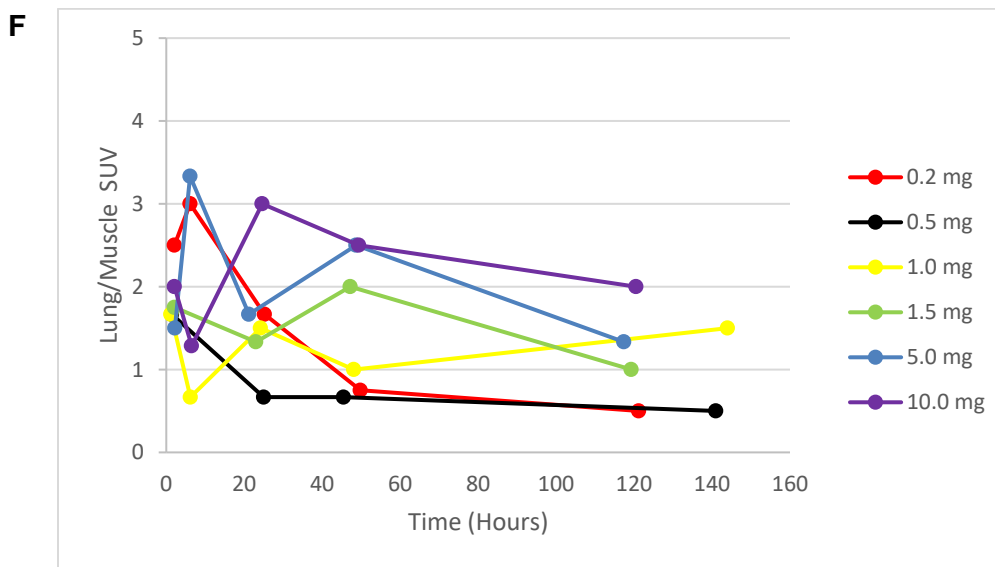

Supplement: jnm229781SupplementalData.pdf [file jnm229781SupplementalData.pdf]
